# Supplementary material for: Fasting Interventions for Stress, Anxiety and Depressive Symptoms: A Systematic Review and Meta-Analysis
Source: MDPI journal article supplement (doi:10.3390/nu13113947), 2021-11-04

Supplementary Table S1. Quality assessment of Ramadan studies.

| Study          | Risk of bias domains |    |    |    |    |    |    | Overall |
|----------------|----------------------|----|----|----|----|----|----|---------|
|                | D1                   | D2 | D3 | D4 | D5 | D6 | D7 |         |
| Al-Ozaini2019  | -                    | +  | -  | +  | +  | -  | +  | -       |
| Mousavi2014    | -                    | +  | -  | +  | +  | -  | -  | -       |
| Erdem2018      | -                    | +  | -  | +  | +  | -  | -  | -       |
| Koushal2013    | -                    | +  | -  | +  | +  | ✗  | -  | ✗       |
| Nugraha (2017) | +                    | +  | +  | +  | +  | -  | -  | -       |

Domains:  
D1: Bias due to confounding.  
D2: Bias due to selection of participants.  
D3: Bias in classification of interventions.  
D4: Bias due to deviations from intended interventions.  
D5: Bias due to missing data.  
D6: Bias in measurement of outcomes.  
D7: Bias in selection of the reported result.

Judgement  
✗ Critical  
✗ Serious  
- Moderate  
+ Low  
? No information  
○ Not applicable

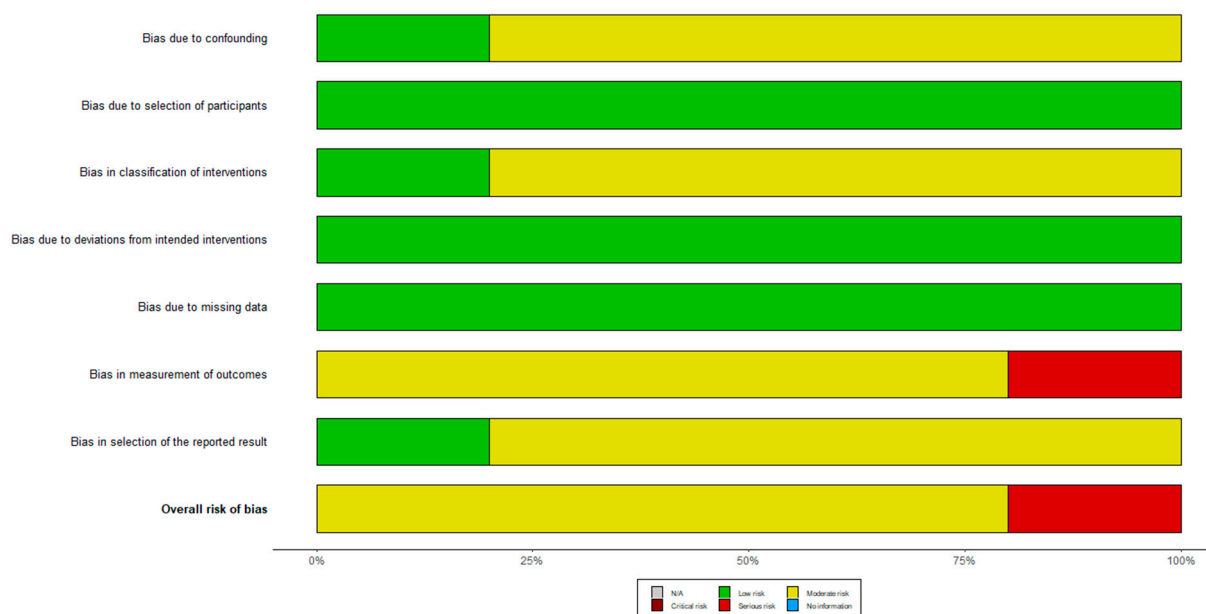

Supplementary Table S2. Quality assessment of controlled trials.

| <u>Study ID</u> | <u>D1</u> | <u>D2</u> | <u>D3</u> | <u>D4</u> | <u>D5</u> | <u>Overall</u> |                                               |
|-----------------|-----------|-----------|-----------|-----------|-----------|----------------|-----------------------------------------------|
| Teng2011        | +         | +         | +         | +         | +         | +              | Low risk                                      |
| Hussin2013      | +         | +         | +         | +         | +         | +              | Some concerns                                 |
| Kahleova2015    | +         | +         | +         | +         | +         | +              | High risk                                     |
| Martin2016      | +         | +         | +         | +         | +         | +              |                                               |
| Nugraha2017     | -         | +         | +         | +         | +         | -              | D1 Randomisation process                      |
| Prehn2017       | !         | +         | +         | +         | +         | !              | D2 Deviations from the intended interventions |
| Kessler2018     | -         | +         | +         | +         | +         | -              | D3 Missing outcome data                       |
|                 |           |           |           |           |           |                | D4 Measurement of the outcome                 |
|                 |           |           |           |           |           |                | D5 Selection of the reported result           |

Summary ROB-2

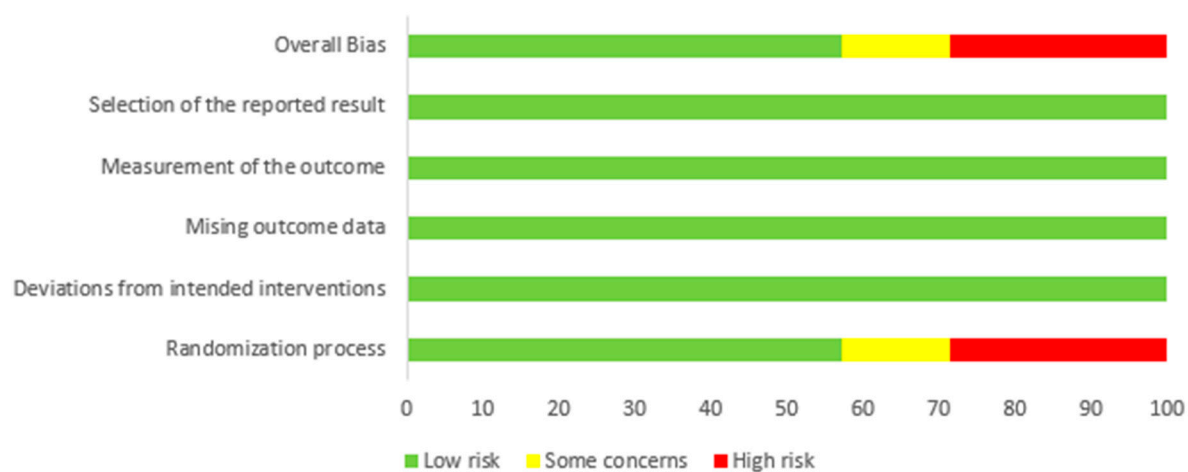

Supplementary Figure S1. Funnel plots of Ramadan studies.

Anxiety

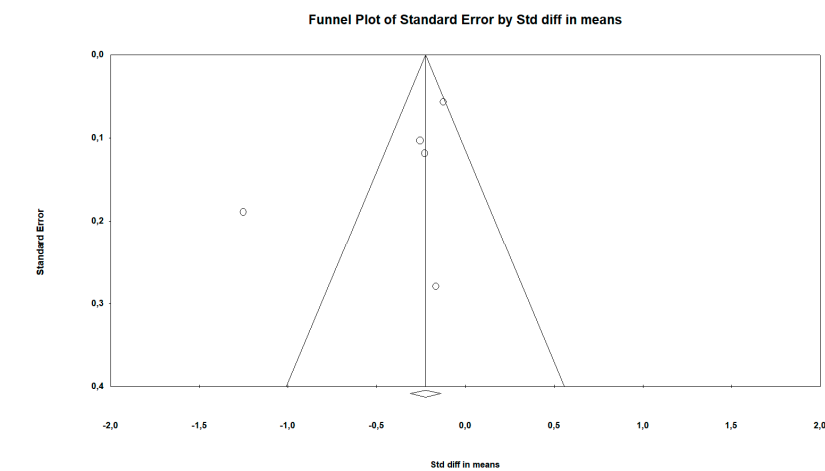

Depression

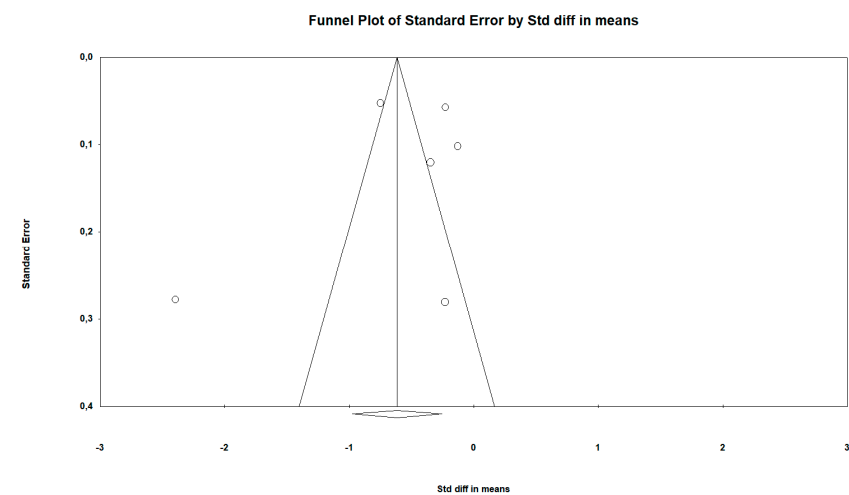

Supplementary Figure S2. Funnel plots of fasting controlled trials.

Anxiety

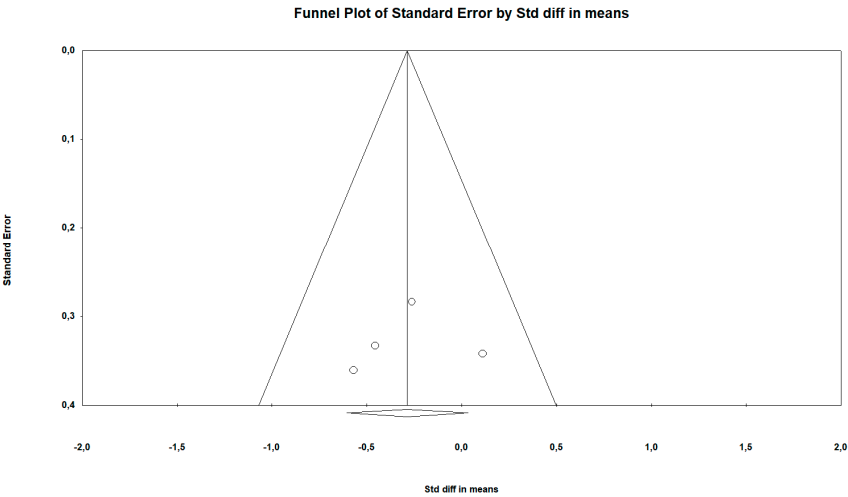

Depression

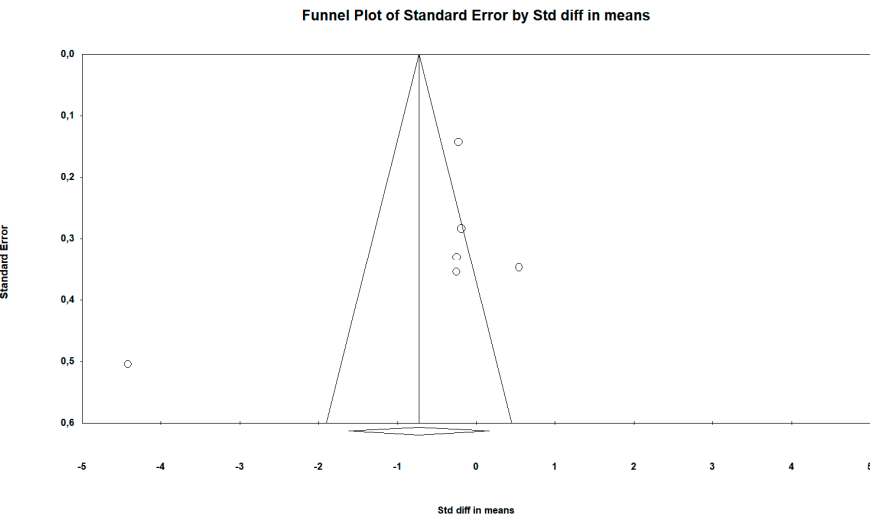

Body Mass Index

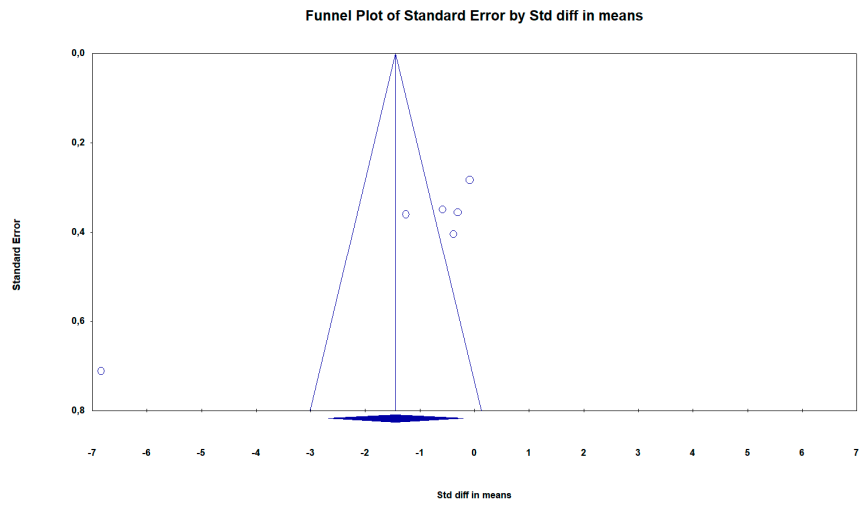

Supplement: s1 [file s1]
